# Supplementary material for: Brief communication: SWM: Stochastic Weather Model for precipitation-related hazard assessments
Source: Copernicus journal article supplement (doi:10.5194/nhess-2023-160), 2023-09-22
Supplement: Supplementary file 2 [file nhess-2023-160-supplement.zip]

Archive with 3 entries (3 files):
- NHESS_2023_160_supp_ material/check2_Tukey_Sample1.txt
- NHESS_2023_160_supp_ material/check2_Tukey_Sample2.txt
- NHESS_2023_160_supp_ material/SWM_supplementary_material.pdf
