# Supplementary material for: Brief communication: SWM: Stochastic Weather Model for precipitation-related hazard assessments
Source: Copernicus journal article supplement (doi:10.5194/nhess-2023-160), 2023-09-22
Supplement: Supplementary file 2 [file nhess-2023-160-supplement.zip › NHESS_2023_160_supp_ material/check2_Tukey_Sample1.txt]

> v <- data.frame(source =c(rep("real", 40*12), rep("fake",40*12*95)),
+                  month = rep(c("jan","feb","mar","apr","may","jun","jul","aug","sep","oct","nov","dec"), 40*96),
+                  sum = rbind(real_bits$sum, fake_bits$sum))
> # build linear models                 
> m1 <- lm(v$sum ~ as.factor(v$source) * as.factor(v$month)) # with interaction
> m2 <- lm(v$sum ~ as.factor(v$source) + as.factor(v$month)) # without interaction
> summary(m1)

Call:
lm(formula = v$sum ~ as.factor(v$source) * as.factor(v$month))

Residuals:
     Min       1Q   Median       3Q      Max 
-0.11501 -0.04375 -0.00851  0.03355  0.43104 

Coefficients:
                                                Estimate Std. Error t value Pr(>|t|)    
(Intercept)                                    1.193e-01  9.630e-04 123.872  < 2e-16 ***
as.factor(v$source)real                       -2.373e-03  9.940e-03  -0.239 0.811344    
as.factor(v$month)aug                         -4.184e-03  1.362e-03  -3.073 0.002124 ** 
as.factor(v$month)dec                         -2.549e-03  1.363e-03  -1.871 0.061412 .  
as.factor(v$month)feb                         -6.130e-04  1.362e-03  -0.450 0.652648    
as.factor(v$month)jan                         -2.695e-03  1.362e-03  -1.979 0.047817 *  
as.factor(v$month)jul                         -3.168e-03  1.362e-03  -2.326 0.020013 *  
as.factor(v$month)jun                         -2.759e-03  1.362e-03  -2.026 0.042749 *  
as.factor(v$month)mar                         -2.639e-03  1.362e-03  -1.938 0.052664 .  
as.factor(v$month)may                         -4.517e-03  1.362e-03  -3.317 0.000911 ***
as.factor(v$month)nov                         -3.004e-03  1.362e-03  -2.206 0.027399 *  
as.factor(v$month)oct                         -2.073e-03  1.362e-03  -1.523 0.127885    
as.factor(v$month)sep                         -2.126e-03  1.362e-03  -1.561 0.118465    
as.factor(v$source)real:as.factor(v$month)aug -3.642e-03  1.406e-02  -0.259 0.795582    
as.factor(v$source)real:as.factor(v$month)dec  1.523e-02  1.406e-02   1.083 0.278723    
as.factor(v$source)real:as.factor(v$month)feb -3.672e-03  1.371e-02  -0.268 0.788739    
as.factor(v$source)real:as.factor(v$month)jan  1.246e-02  1.371e-02   0.909 0.363094    
as.factor(v$source)real:as.factor(v$month)jul -6.434e-03  1.371e-02  -0.469 0.638746    
as.factor(v$source)real:as.factor(v$month)jun  3.317e-03  1.371e-02   0.242 0.808756    
as.factor(v$source)real:as.factor(v$month)mar  1.119e-02  1.371e-02   0.816 0.414327    
as.factor(v$source)real:as.factor(v$month)may -4.346e-03  1.371e-02  -0.317 0.751158    
as.factor(v$source)real:as.factor(v$month)nov -4.846e-03  1.379e-02  -0.351 0.725252    
as.factor(v$source)real:as.factor(v$month)oct -8.344e-05  1.371e-02  -0.006 0.995143    
as.factor(v$source)real:as.factor(v$month)sep  3.271e-03  1.371e-02   0.239 0.811361    
---
Signif. codes:  0 ‘***’ 0.001 ‘**’ 0.01 ‘*’ 0.05 ‘.’ 0.1 ‘ ’ 1

Residual standard error: 0.05936 on 46033 degrees of freedom
  (23 observations deleted due to missingness)
Multiple R-squared:  0.0005712,	Adjusted R-squared:  7.188e-05 
F-statistic: 1.144 on 23 and 46033 DF,  p-value: 0.2865

> summary(m2)

Call:
lm(formula = v$sum ~ as.factor(v$source) + as.factor(v$month))

Residuals:
     Min       1Q   Median       3Q      Max 
-0.11499 -0.04372 -0.00852  0.03355  0.43106 

Coefficients:
                          Estimate Std. Error t value Pr(>|t|)    
(Intercept)              0.1192675  0.0009587 124.400  < 2e-16 ***
as.factor(v$source)real -0.0005388  0.0027608  -0.195 0.845279    
as.factor(v$month)aug   -0.0042185  0.0013554  -3.112 0.001857 ** 
as.factor(v$month)dec   -0.0024058  0.0013563  -1.774 0.076087 .  
as.factor(v$month)feb   -0.0006531  0.0013550  -0.482 0.629821    
as.factor(v$month)jan   -0.0025672  0.0013550  -1.895 0.058154 .  
as.factor(v$month)jul   -0.0032368  0.0013550  -2.389 0.016910 *  
as.factor(v$month)jun   -0.0027267  0.0013550  -2.012 0.044194 *  
as.factor(v$month)mar   -0.0025242  0.0013550  -1.863 0.062488 .  
as.factor(v$month)may   -0.0045641  0.0013550  -3.368 0.000757 ***
as.factor(v$month)nov   -0.0030547  0.0013551  -2.254 0.024189 *  
as.factor(v$month)oct   -0.0020762  0.0013550  -1.532 0.125473    
as.factor(v$month)sep   -0.0020940  0.0013550  -1.545 0.122259    
---
Signif. codes:  0 ‘***’ 0.001 ‘**’ 0.01 ‘*’ 0.05 ‘.’ 0.1 ‘ ’ 1

Residual standard error: 0.05936 on 46044 degrees of freedom
  (23 observations deleted due to missingness)
Multiple R-squared:  0.0004297,	Adjusted R-squared:  0.0001692 
F-statistic: 1.649 on 12 and 46044 DF,  p-value: 0.07117

> options(max.print=999999)
> TukeyHSD(aov(m1))
  Tukey multiple comparisons of means
    95% family-wise confidence level

Fit: aov(formula = m1)

$`as.factor(v$source)`
                   diff          lwr         upr     p adj
real-fake -0.0005453384 -0.005956675 0.004865998 0.8434212

$`as.factor(v$month)`
                 diff           lwr           upr     p adj
aug-apr -4.218495e-03 -0.0086480505  0.0002110607 0.0793942
dec-apr -2.405849e-03 -0.0068382980  0.0020266000 0.8325074
feb-apr -6.530866e-04 -0.0050814885  0.0037753153 0.9999984
jan-apr -2.567181e-03 -0.0069955828  0.0018612210 0.7630290
jul-apr -3.236794e-03 -0.0076651962  0.0011916076 0.4136817
jun-apr -2.726697e-03 -0.0071550989  0.0017017049 0.6852203
mar-apr -2.524200e-03 -0.0069526017  0.0019042021 0.7824266
may-apr -4.564112e-03 -0.0089925140 -0.0001357102 0.0364631
nov-apr -3.054662e-03 -0.0074833518  0.0013740284 0.5098621
oct-apr -2.076184e-03 -0.0065045857  0.0023522181 0.9319091
sep-apr -2.094020e-03 -0.0065224220  0.0023343818 0.9279088
dec-aug  1.812646e-03 -0.0026198031  0.0062450949 0.9744343
feb-aug  3.565408e-03 -0.0008629936  0.0079938102 0.2620192
jan-aug  1.651314e-03 -0.0027770879  0.0060797159 0.9876321
jul-aug  9.817005e-04 -0.0034467014  0.0054101024 0.9998939
jun-aug  1.491798e-03 -0.0029366040  0.0059201998 0.9947144
mar-aug  1.694295e-03 -0.0027341069  0.0061226970 0.9847898
may-aug -3.456173e-04 -0.0047740192  0.0040827846 1.0000000
nov-aug  1.163833e-03 -0.0032648570  0.0055925233 0.9994459
oct-aug  2.142311e-03 -0.0022860908  0.0065707130 0.9162802
sep-aug  2.124475e-03 -0.0023039271  0.0065528767 0.9207122
feb-dec  1.752762e-03 -0.0026785337  0.0061840585 0.9802230
jan-dec -1.613319e-04 -0.0045926280  0.0042699642 1.0000000
jul-dec -8.309453e-04 -0.0052622414  0.0036003507 0.9999803
jun-dec -3.208480e-04 -0.0047521441  0.0041104481 1.0000000
mar-dec -1.183508e-04 -0.0045496469  0.0043129453 1.0000000
may-dec -2.158263e-03 -0.0065895592  0.0022730329 0.9125466
nov-dec -6.488127e-04 -0.0050803969  0.0037827714 0.9999985
oct-dec  3.296652e-04 -0.0041016309  0.0047609613 1.0000000
sep-dec  3.118289e-04 -0.0041194672  0.0047431250 1.0000000
jan-feb -1.914094e-03 -0.0063413422  0.0025131536 0.9613414
jul-feb -2.583708e-03 -0.0070109557  0.0018435402 0.7550601
jun-feb -2.073610e-03 -0.0065008583  0.0023536375 0.9323551
mar-feb -1.871113e-03 -0.0062983612  0.0025561347 0.9672703
may-feb -3.911026e-03 -0.0083382735  0.0005162224 0.1453800
nov-feb -2.401575e-03 -0.0068291113  0.0020259611 0.8331292
oct-feb -1.423097e-03 -0.0058503451  0.0030041507 0.9964858
sep-feb -1.440933e-03 -0.0058681814  0.0029863145 0.9960797
jul-jan -6.696134e-04 -0.0050968613  0.0037576345 0.9999979
jun-jan -1.595161e-04 -0.0045867640  0.0042677319 1.0000000
mar-jan  4.298109e-05 -0.0043842668  0.0044702290 1.0000000
may-jan -1.996931e-03 -0.0064241792  0.0024303167 0.9477335
nov-jan -4.874808e-04 -0.0049150170  0.0039400554 0.9999999
oct-jan  4.909971e-04 -0.0039362508  0.0049182450 0.9999999
sep-jan  4.731609e-04 -0.0039540871  0.0049004088 0.9999999
jun-jul  5.100974e-04 -0.0039171506  0.0049373453 0.9999999
mar-jul  7.125945e-04 -0.0037146534  0.0051398424 0.9999959
may-jul -1.327318e-03 -0.0057545657  0.0030999301 0.9981150
nov-jul  1.821326e-04 -0.0042454036  0.0046096688 1.0000000
oct-jul  1.160611e-03 -0.0032666374  0.0055878585 0.9994586
sep-jul  1.142774e-03 -0.0032844736  0.0055700222 0.9995329
mar-jun  2.024972e-04 -0.0042247508  0.0046297451 1.0000000
may-jun -1.837415e-03 -0.0062646631  0.0025898328 0.9714195
nov-jun -3.279647e-04 -0.0047555010  0.0040995715 1.0000000
oct-jun  6.505132e-04 -0.0037767347  0.0050777611 0.9999984
sep-jun  6.326769e-04 -0.0037945710  0.0050599248 0.9999988
may-mar -2.039912e-03 -0.0064671602  0.0023873356 0.9394574
nov-mar -5.304619e-04 -0.0049579981  0.0038970743 0.9999998
oct-mar  4.480160e-04 -0.0039792319  0.0048752640 1.0000000
sep-mar  4.301798e-04 -0.0039970682  0.0048574277 1.0000000
nov-may  1.509450e-03 -0.0029180858  0.0059369867 0.9941434
oct-may  2.487928e-03 -0.0019393196  0.0069151763 0.7979137
sep-may  2.470092e-03 -0.0019571558  0.0068973400 0.8054592
oct-nov  9.784779e-04 -0.0034490583  0.0054060141 0.9998971
sep-nov  9.606417e-04 -0.0034668946  0.0053881779 0.9999143
sep-oct -1.783626e-05 -0.0044450842  0.0044094117 1.0000000

$`as.factor(v$source):as.factor(v$month)`
                           diff          lwr          upr     p adj
real:apr-fake:apr -2.372679e-03 -0.038527946 0.0337825874 1.0000000
fake:aug-fake:apr -4.184316e-03 -0.009137661 0.0007690281 0.2495126
real:aug-fake:apr -1.019892e-02 -0.046354187 0.0259563465 0.9999980
fake:dec-fake:apr -2.549084e-03 -0.007505694 0.0024075270 0.9744174
real:dec-fake:apr  1.030566e-02 -0.025849605 0.0464609284 0.9999975
fake:feb-fake:apr -6.129480e-04 -0.005566292 0.0043403963 1.0000000
real:feb-fake:apr -6.657913e-03 -0.040975689 0.0276598631 1.0000000
fake:jan-fake:apr -2.695136e-03 -0.007648480 0.0022582082 0.9525362
real:jan-fake:apr  7.396904e-03 -0.026920872 0.0417146804 1.0000000
fake:jul-fake:apr -3.167888e-03 -0.008121233 0.0017854559 0.7993909
real:jul-fake:apr -1.197451e-02 -0.046292288 0.0223432643 0.9999058
fake:jun-fake:apr -2.759364e-03 -0.007712709 0.0021939801 0.9395997
real:jun-fake:apr -1.814969e-03 -0.036132745 0.0325028070 1.0000000
fake:mar-fake:apr -2.638852e-03 -0.007592196 0.0023144926 0.9620866
real:mar-fake:apr  6.176069e-03 -0.028141707 0.0404938452 1.0000000
fake:may-fake:apr -4.516955e-03 -0.009470299 0.0004363896 0.1334382
real:may-fake:apr -1.123573e-02 -0.045553504 0.0230820488 0.9999687
fake:nov-fake:apr -3.004022e-03 -0.007957366 0.0019493225 0.8679419
real:nov-fake:apr -1.022224e-02 -0.044972678 0.0245281966 0.9999955
fake:oct-fake:apr -2.073429e-03 -0.007026773 0.0028799153 0.9982967
real:oct-fake:apr -4.529544e-03 -0.038847320 0.0297882319 1.0000000
fake:sep-fake:apr -2.126208e-03 -0.007079552 0.0028271367 0.9975445
real:sep-fake:apr -1.227861e-03 -0.035545638 0.0330899147 1.0000000
fake:aug-real:apr -1.811637e-03 -0.037966904 0.0343436298 1.0000000
real:aug-real:apr -7.826241e-03 -0.058717016 0.0430645343 1.0000000
fake:dec-real:apr -1.764043e-04 -0.036332119 0.0359793100 1.0000000
real:dec-real:apr  1.267834e-02 -0.038212434 0.0635691163 0.9999998
fake:feb-real:apr  1.759731e-03 -0.034395535 0.0379149980 1.0000000
real:feb-real:apr -4.285234e-03 -0.053887426 0.0453169582 1.0000000
fake:jan-real:apr -3.224568e-04 -0.036477724 0.0358328099 1.0000000
real:jan-real:apr  9.769584e-03 -0.039832608 0.0593717756 1.0000000
fake:jul-real:apr -7.952092e-04 -0.036950476 0.0353600576 1.0000000
real:jul-real:apr -9.601833e-03 -0.059204025 0.0400003594 1.0000000
fake:jun-real:apr -3.866849e-04 -0.036541952 0.0357685818 1.0000000
real:jun-real:apr  5.577101e-04 -0.049044482 0.0501599022 1.0000000
fake:mar-real:apr -2.661724e-04 -0.036421439 0.0358890943 1.0000000
real:mar-real:apr  8.548748e-03 -0.041053444 0.0581509404 1.0000000
fake:may-real:apr -2.144275e-03 -0.038299542 0.0340109913 1.0000000
real:may-real:apr -8.863048e-03 -0.058465240 0.0407391439 1.0000000
fake:nov-real:apr -6.313425e-04 -0.036786609 0.0355239242 1.0000000
real:nov-real:apr -7.849561e-03 -0.057752072 0.0420529494 1.0000000
fake:oct-real:apr  2.992503e-04 -0.035856016 0.0364545170 1.0000000
real:oct-real:apr -2.156865e-03 -0.051759057 0.0474453271 1.0000000
fake:sep-real:apr  2.464717e-04 -0.035908795 0.0364017384 1.0000000
real:sep-real:apr  1.144818e-03 -0.048457374 0.0507470098 1.0000000
real:aug-fake:aug -6.014604e-03 -0.042169871 0.0301406627 1.0000000
fake:dec-fake:aug  1.635233e-03 -0.003321378 0.0065918432 0.9999642
real:dec-fake:aug  1.448998e-02 -0.021665289 0.0506452447 0.9991141
fake:feb-fake:aug  3.571368e-03 -0.001381976 0.0085247126 0.5788890
real:feb-fake:aug -2.473597e-03 -0.036791373 0.0318441793 1.0000000
fake:jan-fake:aug  1.489180e-03 -0.003464164 0.0064425244 0.9999933
real:jan-fake:aug  1.158122e-02 -0.022736556 0.0458989967 0.9999469
fake:jul-fake:aug  1.016428e-03 -0.003936917 0.0059697721 1.0000000
real:jul-fake:aug -7.790196e-03 -0.042107972 0.0265275805 1.0000000
fake:jun-fake:aug  1.424952e-03 -0.003528392 0.0063782963 0.9999970
real:jun-fake:aug  2.369347e-03 -0.031948429 0.0366871232 1.0000000
fake:mar-fake:aug  1.545465e-03 -0.003407880 0.0064988088 0.9999868
real:mar-fake:aug  1.036039e-02 -0.023957391 0.0446781614 0.9999927
fake:may-fake:aug -3.326385e-04 -0.005285983 0.0046207058 1.0000000
real:may-fake:aug -7.051411e-03 -0.041369187 0.0272663650 1.0000000
fake:nov-fake:aug  1.180294e-03 -0.003773050 0.0061336387 0.9999999
real:nov-fake:aug -6.037924e-03 -0.040788362 0.0287125128 1.0000000
fake:oct-fake:aug  2.110887e-03 -0.002842457 0.0070642315 0.9977877
real:oct-fake:aug -3.452280e-04 -0.034663004 0.0339725482 1.0000000
fake:sep-fake:aug  2.058109e-03 -0.002895236 0.0070114529 0.9984735
real:sep-fake:aug  2.956455e-03 -0.031361321 0.0372742309 1.0000000
fake:dec-real:aug  7.649837e-03 -0.028505878 0.0438055509 1.0000000
real:dec-real:aug  2.050458e-02 -0.030386193 0.0713953572 0.9990389
fake:feb-real:aug  9.585972e-03 -0.026569295 0.0457412389 0.9999994
real:feb-real:aug  3.541007e-03 -0.046061185 0.0531431991 1.0000000
fake:jan-real:aug  7.503784e-03 -0.028651483 0.0436590508 1.0000000
real:jan-real:aug  1.759582e-02 -0.032006368 0.0671980165 0.9998754
fake:jul-real:aug  7.031032e-03 -0.029124235 0.0431862985 1.0000000
real:jul-real:aug -1.775592e-03 -0.051377784 0.0478266003 1.0000000
fake:jun-real:aug  7.439556e-03 -0.028715711 0.0435948227 1.0000000
real:jun-real:aug  8.383951e-03 -0.041218241 0.0579861430 1.0000000
fake:mar-real:aug  7.560069e-03 -0.028595198 0.0437153352 1.0000000
real:mar-real:aug  1.637499e-02 -0.033227203 0.0659771813 0.9999638
fake:may-real:aug  5.681965e-03 -0.030473301 0.0418372322 1.0000000
real:may-real:aug -1.036807e-03 -0.050638999 0.0485653848 1.0000000
fake:nov-real:aug  7.194898e-03 -0.028960368 0.0433501651 1.0000000
real:nov-real:aug -2.332046e-05 -0.049925831 0.0498791903 1.0000000
fake:oct-real:aug  8.125491e-03 -0.028029776 0.0442807579 1.0000000
real:oct-real:aug  5.669376e-03 -0.043932816 0.0552715680 1.0000000
fake:sep-real:aug  8.072713e-03 -0.028082554 0.0442279793 1.0000000
real:sep-real:aug  8.971059e-03 -0.040631133 0.0585732507 1.0000000
real:dec-fake:dec  1.285475e-02 -0.023300969 0.0490104597 0.9998707
fake:feb-fake:dec  1.936136e-03 -0.003020475 0.0068927463 0.9994046
real:feb-fake:dec -4.108829e-03 -0.038427077 0.0302094183 1.0000000
fake:jan-fake:dec -1.460525e-04 -0.005102663 0.0048105581 1.0000000
real:jan-fake:dec  9.945988e-03 -0.024372260 0.0442642357 0.9999966
fake:jul-fake:dec -6.188048e-04 -0.005575415 0.0043378058 1.0000000
real:jul-fake:dec -9.425428e-03 -0.043743676 0.0248928195 0.9999988
fake:jun-fake:dec -2.102806e-04 -0.005166891 0.0047463300 1.0000000
real:jun-fake:dec  7.341145e-04 -0.033584133 0.0350523622 1.0000000
fake:mar-fake:dec -8.976806e-05 -0.005046379 0.0048668426 1.0000000
real:mar-fake:dec  8.725153e-03 -0.025593095 0.0430434005 0.9999997
fake:may-fake:dec -1.967871e-03 -0.006924482 0.0029887396 0.9992334
real:may-fake:dec -8.686644e-03 -0.043004892 0.0256316040 0.9999997
fake:nov-fake:dec -4.549382e-04 -0.005411549 0.0045016725 1.0000000
real:nov-fake:dec -7.673157e-03 -0.042424060 0.0270777459 1.0000000
fake:oct-fake:dec  4.756546e-04 -0.004480956 0.0054322652 1.0000000
real:oct-fake:dec -1.980461e-03 -0.036298708 0.0323377872 1.0000000
fake:sep-fake:dec  4.228760e-04 -0.004533735 0.0053794867 1.0000000
real:sep-fake:dec  1.321222e-03 -0.032997026 0.0356394699 1.0000000
fake:feb-real:dec -1.091861e-02 -0.047073876 0.0252366570 0.9999927
real:feb-real:dec -1.696357e-02 -0.066565767 0.0326386172 0.9999331
fake:jan-real:dec -1.300080e-02 -0.049156065 0.0231544689 0.9998437
real:jan-real:dec -2.908757e-03 -0.052510949 0.0466934346 1.0000000
fake:jul-real:dec -1.347355e-02 -0.049628817 0.0226817165 0.9997189
real:jul-real:dec -2.228017e-02 -0.071882366 0.0273220184 0.9953568
fake:jun-real:dec -1.306503e-02 -0.049220293 0.0230902408 0.9998304
real:jun-real:dec -1.212063e-02 -0.061722823 0.0374815611 0.9999999
fake:mar-real:dec -1.294451e-02 -0.049099780 0.0232107533 0.9998546
real:mar-real:dec -4.129593e-03 -0.053731785 0.0454725993 1.0000000
fake:may-real:dec -1.482262e-02 -0.050977883 0.0213326503 0.9987501
real:may-real:dec -2.154139e-02 -0.071143581 0.0280608029 0.9970992
fake:nov-real:dec -1.330968e-02 -0.049464950 0.0228455832 0.9997697
real:nov-real:dec -2.052790e-02 -0.070430413 0.0293746084 0.9986850
fake:oct-real:dec -1.237909e-02 -0.048534357 0.0237761759 0.9999318
real:oct-real:dec -1.483521e-02 -0.064437398 0.0347669861 0.9999939
fake:sep-real:dec -1.243187e-02 -0.048587136 0.0237233974 0.9999266
real:sep-real:dec -1.153352e-02 -0.061135715 0.0380686688 1.0000000
real:feb-fake:feb -6.044965e-03 -0.040362741 0.0282728110 1.0000000
fake:jan-fake:feb -2.082188e-03 -0.007035532 0.0028711562 0.9981878
real:jan-fake:feb  8.009852e-03 -0.026307924 0.0423276284 0.9999999
fake:jul-fake:feb -2.554940e-03 -0.007508285 0.0023984039 0.9735379
real:jul-fake:feb -1.136156e-02 -0.045679340 0.0229562123 0.9999619
fake:jun-fake:feb -2.146416e-03 -0.007099761 0.0028069281 0.9971888
real:jun-fake:feb -1.202021e-03 -0.035519797 0.0331157550 1.0000000
fake:mar-fake:feb -2.025904e-03 -0.006979248 0.0029274406 0.9987940
real:mar-fake:feb  6.789017e-03 -0.027528759 0.0411067932 1.0000000
fake:may-fake:feb -3.904007e-03 -0.008857351 0.0010493376 0.3862946
real:may-fake:feb -1.062278e-02 -0.044940556 0.0236949968 0.9999885
fake:nov-fake:feb -2.391074e-03 -0.007344418 0.0025622705 0.9880463
real:nov-fake:feb -9.609293e-03 -0.044359730 0.0251411446 0.9999986
fake:oct-fake:feb -1.460481e-03 -0.006413825 0.0034928633 0.9999953
real:oct-fake:feb -3.916596e-03 -0.038234372 0.0304011799 1.0000000
fake:sep-fake:feb -1.513260e-03 -0.006466604 0.0034400847 0.9999910
real:sep-fake:feb -6.149135e-04 -0.034932690 0.0337028627 1.0000000
fake:jan-real:feb  3.962777e-03 -0.030354999 0.0382805532 1.0000000
real:jan-real:feb  1.405482e-02 -0.034224411 0.0623340459 0.9999963
fake:jul-real:feb  3.490025e-03 -0.030827752 0.0378078008 1.0000000
real:jul-real:feb -5.316599e-03 -0.053595827 0.0429626297 1.0000000
fake:jun-real:feb  3.898549e-03 -0.030419227 0.0382163251 1.0000000
real:jun-real:feb  4.842944e-03 -0.043436285 0.0531221724 1.0000000
fake:mar-real:feb  4.019061e-03 -0.030298715 0.0383368376 1.0000000
real:mar-real:feb  1.283398e-02 -0.035445246 0.0611132106 0.9999993
fake:may-real:feb  2.140958e-03 -0.032176818 0.0364587346 1.0000000
real:may-real:feb -4.577814e-03 -0.052857043 0.0437014142 1.0000000
fake:nov-real:feb  3.653891e-03 -0.030663885 0.0379716675 1.0000000
real:nov-real:feb -3.564328e-03 -0.052152053 0.0450233975 1.0000000
fake:oct-real:feb  4.584484e-03 -0.029733292 0.0389022602 1.0000000
real:oct-real:feb  2.128369e-03 -0.046150860 0.0504075974 1.0000000
fake:sep-real:feb  4.531705e-03 -0.029786071 0.0388494817 1.0000000
real:sep-real:feb  5.430052e-03 -0.042849177 0.0537092801 1.0000000
real:jan-fake:jan  1.009204e-02 -0.024225736 0.0444098166 0.9999955
fake:jul-fake:jan -4.727523e-04 -0.005426097 0.0044805920 1.0000000
real:jul-fake:jan -9.279376e-03 -0.043597152 0.0250384004 0.9999991
fake:jun-fake:jan -6.422810e-05 -0.005017572 0.0048891162 1.0000000
real:jun-fake:jan  8.801669e-04 -0.033437609 0.0351979431 1.0000000
fake:mar-fake:jan  5.628442e-05 -0.004897060 0.0050096287 1.0000000
real:mar-fake:jan  8.871205e-03 -0.025446571 0.0431889813 0.9999996
fake:may-fake:jan -1.821819e-03 -0.006775163 0.0031315257 0.9997731
real:may-fake:jan -8.540591e-03 -0.042858367 0.0257771849 0.9999998
fake:nov-fake:jan -3.088857e-04 -0.005262230 0.0046444587 1.0000000
real:nov-fake:jan -7.527105e-03 -0.042277542 0.0272233327 1.0000000
fake:oct-fake:jan  6.217071e-04 -0.004331637 0.0055750514 1.0000000
real:oct-fake:jan -1.834408e-03 -0.036152184 0.0324833681 1.0000000
fake:sep-fake:jan  5.689285e-04 -0.004384416 0.0055222728 1.0000000
real:sep-fake:jan  1.467275e-03 -0.032850502 0.0357850508 1.0000000
fake:jul-real:jan -1.056479e-02 -0.044882569 0.0237529834 0.9999896
real:jul-real:jan -1.937142e-02 -0.067650645 0.0289078123 0.9990982
fake:jun-real:jan -1.015627e-02 -0.044474045 0.0241615077 0.9999950
real:jun-real:jan -9.211873e-03 -0.057491102 0.0390673550 1.0000000
fake:mar-real:jan -1.003576e-02 -0.044353532 0.0242820202 0.9999960
real:mar-real:jan -1.220835e-03 -0.049500064 0.0470583933 1.0000000
fake:may-real:jan -1.191386e-02 -0.046231635 0.0224039172 0.9999135
real:may-real:jan -1.863263e-02 -0.066911860 0.0296465968 0.9995075
fake:nov-real:jan -1.040093e-02 -0.044718702 0.0239168501 0.9999922
real:nov-real:jan -1.761914e-02 -0.066206870 0.0309685802 0.9998203
fake:oct-real:jan -9.470333e-03 -0.043788109 0.0248474429 0.9999986
real:oct-real:jan -1.192645e-02 -0.060205677 0.0363527800 0.9999998
fake:sep-real:jan -9.523112e-03 -0.043840888 0.0247946643 0.9999985
real:sep-real:jan -8.624766e-03 -0.056903994 0.0396544627 1.0000000
real:jul-fake:jul -8.806623e-03 -0.043124400 0.0255111528 0.9999997
fake:jun-fake:jul  4.085242e-04 -0.004544820 0.0053618686 1.0000000
real:jun-fake:jul  1.352919e-03 -0.032964857 0.0356706955 1.0000000
fake:mar-fake:jul  5.290368e-04 -0.004424308 0.0054823811 1.0000000
real:mar-fake:jul  9.343958e-03 -0.024973819 0.0436617337 0.9999990
fake:may-fake:jul -1.349066e-03 -0.006302411 0.0036042781 0.9999989
real:may-fake:jul -8.067839e-03 -0.042385615 0.0262499373 0.9999999
fake:nov-fake:jul  1.638667e-04 -0.004789478 0.0051172110 1.0000000
real:nov-fake:jul -7.054352e-03 -0.041804789 0.0276960850 1.0000000
fake:oct-fake:jul  1.094459e-03 -0.003858885 0.0060478037 1.0000000
real:oct-fake:jul -1.361656e-03 -0.035679432 0.0329561204 1.0000000
fake:sep-fake:jul  1.041681e-03 -0.003911663 0.0059950252 1.0000000
real:sep-fake:jul  1.940027e-03 -0.032377749 0.0362578031 1.0000000
fake:jun-real:jul  9.215148e-03 -0.025102629 0.0435329238 0.9999992
real:jun-real:jul  1.015954e-02 -0.038119686 0.0584387712 1.0000000
fake:mar-real:jul  9.335660e-03 -0.024982116 0.0436534363 0.9999990
real:mar-real:jul  1.815058e-02 -0.030128648 0.0664298094 0.9996759
fake:may-real:jul  7.457557e-03 -0.026860219 0.0417753333 1.0000000
real:may-real:jul  7.387845e-04 -0.047540444 0.0490180130 1.0000000
fake:nov-real:jul  8.970490e-03 -0.025347286 0.0432882663 0.9999995
real:nov-real:jul  1.752271e-03 -0.046835454 0.0503399963 1.0000000
fake:oct-real:jul  9.901083e-03 -0.024416693 0.0442188590 0.9999969
real:oct-real:jul  7.444968e-03 -0.040834261 0.0557241961 1.0000000
fake:sep-real:jul  9.848304e-03 -0.024469472 0.0441660804 0.9999972
real:sep-real:jul  1.074665e-02 -0.037532578 0.0590258789 1.0000000
real:jun-fake:jun  9.443950e-04 -0.033373381 0.0352621712 1.0000000
fake:mar-fake:jun  1.205125e-04 -0.004832832 0.0050738568 1.0000000
real:mar-fake:jun  8.935433e-03 -0.025382343 0.0432532094 0.9999996
fake:may-fake:jun -1.757590e-03 -0.006710935 0.0031957538 0.9998749
real:may-fake:jun -8.476363e-03 -0.042794139 0.0258414130 0.9999998
fake:nov-fake:jun -2.446576e-04 -0.005198002 0.0047086868 1.0000000
real:nov-fake:jun -7.462876e-03 -0.042213314 0.0272875608 1.0000000
fake:oct-fake:jun  6.859352e-04 -0.004267409 0.0056392795 1.0000000
real:oct-fake:jun -1.770180e-03 -0.036087956 0.0325475962 1.0000000
fake:sep-fake:jun  6.331566e-04 -0.004320188 0.0055865009 1.0000000
real:sep-fake:jun  1.531503e-03 -0.032786273 0.0358492789 1.0000000
fake:mar-real:jun -8.238825e-04 -0.035141659 0.0334938936 1.0000000
real:mar-real:jun  7.991038e-03 -0.040288190 0.0562702667 1.0000000
fake:may-real:jun -2.701986e-03 -0.037019762 0.0316157906 1.0000000
real:may-real:jun -9.420758e-03 -0.057699987 0.0388584703 1.0000000
fake:nov-real:jun -1.189053e-03 -0.035506829 0.0331287235 1.0000000
real:nov-real:jun -8.407271e-03 -0.056994997 0.0401804536 1.0000000
fake:oct-real:jun -2.584599e-04 -0.034576236 0.0340593163 1.0000000
real:oct-real:jun -2.714575e-03 -0.050993804 0.0455646534 1.0000000
fake:sep-real:jun -3.112384e-04 -0.034629015 0.0340065377 1.0000000
real:sep-real:jun  5.871077e-04 -0.047692121 0.0488663362 1.0000000
real:mar-fake:mar  8.814921e-03 -0.025502855 0.0431326969 0.9999997
fake:may-fake:mar -1.878103e-03 -0.006831447 0.0030752413 0.9996285
real:may-fake:mar -8.596876e-03 -0.042914652 0.0257209005 0.9999998
fake:nov-fake:mar -3.651701e-04 -0.005318514 0.0045881742 1.0000000
real:nov-fake:mar -7.583389e-03 -0.042333826 0.0271670483 1.0000000
fake:oct-fake:mar  5.654227e-04 -0.004387922 0.0055187670 1.0000000
real:oct-fake:mar -1.890693e-03 -0.036208469 0.0324270837 1.0000000
fake:sep-fake:mar  5.126441e-04 -0.004440700 0.0054659884 1.0000000
real:sep-fake:mar  1.410990e-03 -0.032906786 0.0357287664 1.0000000
fake:may-real:mar -1.069302e-02 -0.045010800 0.0236247524 0.9999871
real:may-real:mar -1.741180e-02 -0.065691025 0.0308674321 0.9998359
fake:nov-real:mar -9.180091e-03 -0.043497867 0.0251376853 0.9999993
real:nov-real:mar -1.639831e-02 -0.064986035 0.0321894154 0.9999468
fake:oct-real:mar -8.249498e-03 -0.042567274 0.0260682781 0.9999999
real:oct-real:mar -1.070561e-02 -0.058984842 0.0375736152 1.0000000
fake:sep-real:mar -8.302277e-03 -0.042620053 0.0260154995 0.9999999
real:sep-real:mar -7.403931e-03 -0.055683159 0.0408752979 1.0000000
real:may-fake:may -6.718773e-03 -0.041036549 0.0275990035 1.0000000
fake:nov-fake:may  1.512933e-03 -0.003440411 0.0064662772 0.9999910
real:nov-fake:may -5.705286e-03 -0.040455723 0.0290451513 1.0000000
fake:oct-fake:may  2.443526e-03 -0.002509819 0.0073968700 0.9843663
real:oct-fake:may -1.258951e-05 -0.034330366 0.0343051867 1.0000000
fake:sep-fake:may  2.390747e-03 -0.002562597 0.0073440914 0.9880668
real:sep-fake:may  3.289093e-03 -0.031028683 0.0376068694 1.0000000
fake:nov-real:may  8.231706e-03 -0.026086071 0.0425494818 0.9999999
real:nov-real:may  1.013487e-03 -0.047574238 0.0496012118 1.0000000
fake:oct-real:may  9.162298e-03 -0.025155478 0.0434800745 0.9999993
real:oct-real:may  6.706183e-03 -0.041573045 0.0549854116 1.0000000
fake:sep-real:may  9.109520e-03 -0.025208256 0.0434272959 0.9999994
real:sep-real:may  1.000787e-02 -0.038271363 0.0582870944 1.0000000
real:nov-fake:nov -7.218219e-03 -0.041968656 0.0275322184 1.0000000
fake:oct-fake:nov  9.305927e-04 -0.004022752 0.0058839371 1.0000000
real:oct-fake:nov -1.525522e-03 -0.035843299 0.0327922537 1.0000000
fake:sep-fake:nov  8.778142e-04 -0.004075530 0.0058311585 1.0000000
real:sep-fake:nov  1.776160e-03 -0.032541616 0.0360939365 1.0000000
fake:oct-real:nov  8.148812e-03 -0.026601626 0.0428992489 0.9999999
real:oct-real:nov  5.692696e-03 -0.042895029 0.0542804215 1.0000000
fake:sep-real:nov  8.096033e-03 -0.026654404 0.0428464703 1.0000000
real:sep-real:nov  8.994379e-03 -0.039593346 0.0575821043 1.0000000
real:oct-fake:oct -2.456115e-03 -0.036773891 0.0318616610 1.0000000
fake:sep-fake:oct -5.277857e-05 -0.005006123 0.0049005658 1.0000000
real:sep-fake:oct  8.455676e-04 -0.033472209 0.0351633437 1.0000000
fake:sep-real:oct  2.403337e-03 -0.031914440 0.0367211128 1.0000000
real:sep-real:oct  3.301683e-03 -0.044977546 0.0515809112 1.0000000
real:sep-fake:sep  8.983461e-04 -0.033419430 0.0352161223 1.0000000

> TukeyHSD(aov(m2))
  Tukey multiple comparisons of means
    95% family-wise confidence level

Fit: aov(formula = m2)

$`as.factor(v$source)`
                   diff          lwr         upr     p adj
real-fake -0.0005453384 -0.005956412 0.004865735 0.8434136

$`as.factor(v$month)`
                 diff           lwr           upr     p adj
aug-apr -4.218495e-03 -0.0086478350  0.0002108453 0.0793599
dec-apr -2.405849e-03 -0.0068380824  0.0020263844 0.8324622
feb-apr -6.530866e-04 -0.0050812731  0.0037750999 0.9999984
jan-apr -2.567181e-03 -0.0069953674  0.0018610056 0.7629716
jul-apr -3.236794e-03 -0.0076649808  0.0011913922 0.4136013
jun-apr -2.726697e-03 -0.0071548835  0.0017014895 0.6851524
mar-apr -2.524200e-03 -0.0069523863  0.0019039867 0.7823723
may-apr -4.564112e-03 -0.0089922986 -0.0001359256 0.0364439
nov-apr -3.054662e-03 -0.0074831364  0.0013738130 0.5097819
oct-apr -2.076184e-03 -0.0065043703  0.0023520027 0.9318869
sep-apr -2.094020e-03 -0.0065222066  0.0023341664 0.9278855
dec-aug  1.812646e-03 -0.0026195875  0.0062448793 0.9744248
feb-aug  3.565408e-03 -0.0008627782  0.0079935948 0.2619491
jan-aug  1.651314e-03 -0.0027768725  0.0060795005 0.9876272
jul-aug  9.817005e-04 -0.0034464860  0.0054098870 0.9998938
jun-aug  1.491798e-03 -0.0029363886  0.0059199844 0.9947122
mar-aug  1.694295e-03 -0.0027338915  0.0061224815 0.9847838
may-aug -3.456173e-04 -0.0047738038  0.0040825692 1.0000000
nov-aug  1.163833e-03 -0.0032646416  0.0055923079 0.9994456
oct-aug  2.142311e-03 -0.0022858754  0.0065704976 0.9162538
sep-aug  2.124475e-03 -0.0023037117  0.0065526613 0.9206870
feb-dec  1.752762e-03 -0.0026783181  0.0061838429 0.9802154
jan-dec -1.613319e-04 -0.0045924125  0.0042697486 1.0000000
jul-dec -8.309453e-04 -0.0052620259  0.0036001352 0.9999803
jun-dec -3.208480e-04 -0.0047519285  0.0041102325 1.0000000
mar-dec -1.183508e-04 -0.0045494314  0.0043127297 1.0000000
may-dec -2.158263e-03 -0.0065893437  0.0022728174 0.9125193
nov-dec -6.488127e-04 -0.0050801813  0.0037825558 0.9999985
oct-dec  3.296652e-04 -0.0041014153  0.0047607457 1.0000000
sep-dec  3.118289e-04 -0.0041192516  0.0047429095 1.0000000
jan-feb -1.914094e-03 -0.0063411269  0.0025129382 0.9613278
jul-feb -2.583708e-03 -0.0070107403  0.0018433248 0.7550014
jun-feb -2.073610e-03 -0.0065006430  0.0023534222 0.9323330
mar-feb -1.871113e-03 -0.0062981458  0.0025559193 0.9672585
may-feb -3.911026e-03 -0.0083380581  0.0005160070 0.1453288
nov-feb -2.401575e-03 -0.0068288960  0.0020257457 0.8330840
oct-feb -1.423097e-03 -0.0058501298  0.0030039354 0.9964842
sep-feb -1.440933e-03 -0.0058679660  0.0029860991 0.9960781
jul-jan -6.696134e-04 -0.0050966460  0.0037574191 0.9999979
jun-jan -1.595161e-04 -0.0045865486  0.0042675165 1.0000000
mar-jan  4.298109e-05 -0.0043840515  0.0044700137 1.0000000
may-jan -1.996931e-03 -0.0064239638  0.0024301013 0.9477158
nov-jan -4.874808e-04 -0.0049148017  0.0039398401 0.9999999
oct-jan  4.909971e-04 -0.0039360355  0.0049180297 0.9999999
sep-jan  4.731609e-04 -0.0039538717  0.0049001934 0.9999999
jun-jul  5.100974e-04 -0.0039169352  0.0049371299 0.9999999
mar-jul  7.125945e-04 -0.0037144381  0.0051396271 0.9999959
may-jul -1.327318e-03 -0.0057543504  0.0030997148 0.9981141
nov-jul  1.821326e-04 -0.0042451882  0.0046094535 1.0000000
oct-jul  1.160611e-03 -0.0032664220  0.0055876431 0.9994584
sep-jul  1.142774e-03 -0.0032842583  0.0055698069 0.9995327
mar-jun  2.024972e-04 -0.0042245354  0.0046295297 1.0000000
may-jun -1.837415e-03 -0.0062644477  0.0025896174 0.9714090
nov-jun -3.279647e-04 -0.0047552856  0.0040993561 1.0000000
oct-jun  6.505132e-04 -0.0037765194  0.0050775458 0.9999984
sep-jun  6.326769e-04 -0.0037943556  0.0050597095 0.9999988
may-mar -2.039912e-03 -0.0064669449  0.0023871203 0.9394373
nov-mar -5.304619e-04 -0.0049577827  0.0038968590 0.9999998
oct-mar  4.480160e-04 -0.0039790165  0.0048750486 1.0000000
sep-mar  4.301798e-04 -0.0039968528  0.0048572123 1.0000000
nov-may  1.509450e-03 -0.0029178704  0.0059367713 0.9941409
oct-may  2.487928e-03 -0.0019391042  0.0069149609 0.7978620
sep-may  2.470092e-03 -0.0019569405  0.0068971247 0.8054089
oct-nov  9.784779e-04 -0.0034488429  0.0054057988 0.9998971
sep-nov  9.606417e-04 -0.0034666792  0.0053879625 0.9999143
sep-oct -1.783626e-05 -0.0044448688  0.0044091963 1.0000000
