# Supplementary material for: Brief communication: SWM: Stochastic Weather Model for precipitation-related hazard assessments
Source: Copernicus journal article supplement (doi:10.5194/nhess-2023-160), 2023-09-22
Supplement: Supplementary file 2 [file nhess-2023-160-supplement.zip › NHESS_2023_160_supp_ material/check2_Tukey_Sample2.txt]

> v <- data.frame(source =c(rep("real", 40*12), rep("fake",40*12*95)),
+                  month = rep(c("jan","feb","mar","apr","may","jun","jul","aug","sep","oct","nov","dec"), 40*96),
+                  sum = rbind(real_bits$sum, fake_bits$sum))
> # build linear models                 
> m1 <- lm(v$sum ~ as.factor(v$source) * as.factor(v$month)) # with interaction
> m2 <- lm(v$sum ~ as.factor(v$source) + as.factor(v$month)) # without interaction
> summary(m1)

Call:
lm(formula = v$sum ~ as.factor(v$source) * as.factor(v$month))

Residuals:
     Min       1Q   Median       3Q      Max 
-0.11226 -0.04177 -0.00789  0.03249  0.43713 

Coefficients:
                                                Estimate Std. Error t value Pr(>|t|)    
(Intercept)                                    1.158e-01  9.157e-04 126.501   <2e-16 ***
as.factor(v$source)real                        1.070e-03  9.453e-03   0.113    0.910    
as.factor(v$month)aug                         -1.046e-03  1.295e-03  -0.807    0.419    
as.factor(v$month)dec                         -9.911e-05  1.296e-03  -0.076    0.939    
as.factor(v$month)feb                          4.539e-04  1.295e-03   0.350    0.726    
as.factor(v$month)jan                          5.661e-04  1.295e-03   0.437    0.662    
as.factor(v$month)jul                          3.130e-04  1.295e-03   0.242    0.809    
as.factor(v$month)jun                          6.695e-04  1.295e-03   0.517    0.605    
as.factor(v$month)mar                          1.754e-03  1.295e-03   1.355    0.176    
as.factor(v$month)may                         -6.121e-04  1.295e-03  -0.473    0.636    
as.factor(v$month)nov                          1.612e-03  1.295e-03   1.245    0.213    
as.factor(v$month)oct                          1.035e-03  1.295e-03   0.799    0.424    
as.factor(v$month)sep                          6.371e-04  1.295e-03   0.492    0.623    
as.factor(v$source)real:as.factor(v$month)aug -6.781e-03  1.337e-02  -0.507    0.612    
as.factor(v$source)real:as.factor(v$month)dec  1.278e-02  1.337e-02   0.956    0.339    
as.factor(v$source)real:as.factor(v$month)feb -4.739e-03  1.303e-02  -0.364    0.716    
as.factor(v$source)real:as.factor(v$month)jan  9.203e-03  1.303e-02   0.706    0.480    
as.factor(v$source)real:as.factor(v$month)jul -9.915e-03  1.303e-02  -0.761    0.447    
as.factor(v$source)real:as.factor(v$month)jun -1.118e-04  1.303e-02  -0.009    0.993    
as.factor(v$source)real:as.factor(v$month)mar  6.794e-03  1.303e-02   0.521    0.602    
as.factor(v$source)real:as.factor(v$month)may -8.251e-03  1.303e-02  -0.633    0.527    
as.factor(v$source)real:as.factor(v$month)nov -9.462e-03  1.311e-02  -0.722    0.471    
as.factor(v$source)real:as.factor(v$month)oct -3.192e-03  1.303e-02  -0.245    0.807    
as.factor(v$source)real:as.factor(v$month)sep  5.078e-04  1.303e-02   0.039    0.969    
---
Signif. codes:  0 ‘***’ 0.001 ‘**’ 0.01 ‘*’ 0.05 ‘.’ 0.1 ‘ ’ 1

Residual standard error: 0.05645 on 46035 degrees of freedom
  (21 observations deleted due to missingness)
Multiple R-squared:  0.0003595,	Adjusted R-squared:  -0.0001399 
F-statistic: 0.7198 on 23 and 46035 DF,  p-value: 0.8305

> summary(m2)

Call:
lm(formula = v$sum ~ as.factor(v$source) + as.factor(v$month))

Residuals:
     Min       1Q   Median       3Q      Max 
-0.11237 -0.04175 -0.00792  0.03250  0.43722 

Coefficients:
                          Estimate Std. Error t value Pr(>|t|)    
(Intercept)              1.159e-01  9.117e-04 127.069   <2e-16 ***
as.factor(v$source)real -8.840e-05  2.625e-03  -0.034    0.973    
as.factor(v$month)aug   -1.109e-03  1.289e-03  -0.861    0.389    
as.factor(v$month)dec    2.107e-05  1.290e-03   0.016    0.987    
as.factor(v$month)feb    4.057e-04  1.289e-03   0.315    0.753    
as.factor(v$month)jan    6.632e-04  1.289e-03   0.515    0.607    
as.factor(v$month)jul    2.109e-04  1.289e-03   0.164    0.870    
as.factor(v$month)jun    6.696e-04  1.289e-03   0.520    0.603    
as.factor(v$month)mar    1.826e-03  1.289e-03   1.417    0.156    
as.factor(v$month)may   -6.969e-04  1.289e-03  -0.541    0.589    
as.factor(v$month)nov    1.517e-03  1.289e-03   1.177    0.239    
as.factor(v$month)oct    1.003e-03  1.289e-03   0.778    0.436    
as.factor(v$month)sep    6.435e-04  1.289e-03   0.499    0.617    
---
Signif. codes:  0 ‘***’ 0.001 ‘**’ 0.01 ‘*’ 0.05 ‘.’ 0.1 ‘ ’ 1

Residual standard error: 0.05645 on 46046 degrees of freedom
  (21 observations deleted due to missingness)
Multiple R-squared:  0.0002003,	Adjusted R-squared:  -6.029e-05 
F-statistic: 0.7686 on 12 and 46046 DF,  p-value: 0.6838

> options(max.print=999999)
> TukeyHSD(aov(m1))
  Tukey multiple comparisons of means
    95% family-wise confidence level

Fit: aov(formula = m1)

$`as.factor(v$source)`
                   diff          lwr         upr     p adj
real-fake -7.044617e-05 -0.005216415 0.005075522 0.9785945

$`as.factor(v$month)`
                 diff          lwr         upr     p adj
aug-apr -1.109253e-03 -0.005321587 0.003103082 0.9994350
dec-apr  2.107334e-05 -0.004193461 0.004235608 1.0000000
feb-apr  4.057061e-04 -0.003805531 0.004616943 1.0000000
jan-apr  6.631478e-04 -0.003548089 0.004874385 0.9999968
jul-apr  2.108911e-04 -0.004000346 0.004422128 1.0000000
jun-apr  6.695434e-04 -0.003541694 0.004880780 0.9999964
mar-apr  1.826261e-03 -0.002384976 0.006037498 0.9604779
may-apr -6.968680e-04 -0.004908105 0.003514369 0.9999946
nov-apr  1.516804e-03 -0.002694707 0.005728315 0.9907008
oct-apr  1.002837e-03 -0.003208400 0.005214074 0.9997855
sep-apr  6.435193e-04 -0.003567718 0.004854756 0.9999976
dec-aug  1.130326e-03 -0.003084208 0.005344860 0.9993282
feb-aug  1.514959e-03 -0.002696278 0.005726196 0.9907893
jan-aug  1.772400e-03 -0.002438837 0.005983637 0.9682686
jul-aug  1.320144e-03 -0.002891093 0.005531381 0.9971854
jun-aug  1.778796e-03 -0.002432441 0.005990033 0.9674094
mar-aug  2.935514e-03 -0.001275723 0.007146751 0.4924043
may-aug  4.123846e-04 -0.003798852 0.004623622 1.0000000
nov-aug  2.626056e-03 -0.001585455 0.006837568 0.6673656
oct-aug  2.112090e-03 -0.002099147 0.006323327 0.8947743
sep-aug  1.752772e-03 -0.002458465 0.005964009 0.9707992
feb-dec  3.846327e-04 -0.003828805 0.004598071 1.0000000
jan-dec  6.420745e-04 -0.003571363 0.004855512 0.9999977
jul-dec  1.898178e-04 -0.004023620 0.004403256 1.0000000
jun-dec  6.484700e-04 -0.003564968 0.004861908 0.9999975
mar-dec  1.805188e-03 -0.002408250 0.006018625 0.9638168
may-dec -7.179413e-04 -0.004931379 0.003495496 0.9999927
nov-dec  1.495731e-03 -0.002717981 0.005709442 0.9917596
oct-dec  9.817637e-04 -0.003231674 0.005195201 0.9998266
sep-dec  6.224460e-04 -0.003590992 0.004835884 0.9999983
jan-feb  2.574418e-04 -0.003952698 0.004467581 1.0000000
jul-feb -1.948149e-04 -0.004404955 0.004015325 1.0000000
jun-feb  2.638373e-04 -0.003946302 0.004473977 1.0000000
mar-feb  1.420555e-03 -0.002789585 0.005630694 0.9946408
may-feb -1.102574e-03 -0.005312714 0.003107566 0.9994638
nov-feb  1.111098e-03 -0.003099316 0.005321512 0.9994235
oct-feb  5.971309e-04 -0.003613009 0.004807271 0.9999989
sep-feb  2.378132e-04 -0.003972326 0.004447953 1.0000000
jul-jan -4.522567e-04 -0.004662396 0.003757883 0.9999999
jun-jan  6.395502e-06 -0.004203744 0.004216535 1.0000000
mar-jan  1.163113e-03 -0.003047027 0.005373253 0.9991125
may-jan -1.360016e-03 -0.005570155 0.002850124 0.9963296
nov-jan  8.536560e-04 -0.003356758 0.005064070 0.9999566
oct-jan  3.396892e-04 -0.003870450 0.004549829 1.0000000
sep-jan -1.962855e-05 -0.004229768 0.004190511 1.0000000
jun-jul  4.586522e-04 -0.003751487 0.004668792 0.9999999
mar-jul  1.615370e-03 -0.002594770 0.005825509 0.9844413
may-jul -9.077591e-04 -0.005117899 0.003302380 0.9999195
nov-jul  1.305913e-03 -0.002904501 0.005516326 0.9974404
oct-jul  7.919459e-04 -0.003418194 0.005002085 0.9999797
sep-jul  4.326282e-04 -0.003777511 0.004642768 1.0000000
mar-jun  1.156718e-03 -0.003053422 0.005366857 0.9991571
may-jun -1.366411e-03 -0.005576551 0.002843728 0.9961754
nov-jun  8.472605e-04 -0.003363153 0.005057674 0.9999597
oct-jun  3.332937e-04 -0.003876846 0.004543433 1.0000000
sep-jun -2.602405e-05 -0.004236164 0.004184116 1.0000000
may-mar -2.523129e-03 -0.006733269 0.001687011 0.7217357
nov-mar -3.094571e-04 -0.004519871 0.003900957 1.0000000
oct-mar -8.234239e-04 -0.005033564 0.003386716 0.9999698
sep-mar -1.182742e-03 -0.005392881 0.003027398 0.9989627
nov-may  2.213672e-03 -0.001996742 0.006424086 0.8602740
oct-may  1.699705e-03 -0.002510435 0.005909845 0.9768302
sep-may  1.340387e-03 -0.002869752 0.005550527 0.9967710
oct-nov -5.139669e-04 -0.004724381 0.003696447 0.9999998
sep-nov -8.732846e-04 -0.005083698 0.003337129 0.9999454
sep-oct -3.593177e-04 -0.004569457 0.003850822 1.0000000

$`as.factor(v$source):as.factor(v$month)`
                           diff          lwr         upr     p adj
real:apr-fake:apr  1.069987e-03 -0.033312258 0.035452231 1.0000000
fake:aug-fake:apr -1.045618e-03 -0.005756055 0.003664819 1.0000000
real:aug-fake:apr -6.756254e-03 -0.041138499 0.027625990 1.0000000
fake:dec-fake:apr -9.911317e-05 -0.004812034 0.004613807 1.0000000
real:dec-fake:apr  1.374833e-02 -0.020633917 0.048130572 0.9991443
fake:feb-fake:apr  4.538952e-04 -0.004256542 0.005164332 1.0000000
real:feb-fake:apr -3.215247e-03 -0.035850110 0.029419616 1.0000000
fake:jan-fake:apr  5.661014e-04 -0.004144335 0.005276538 1.0000000
real:jan-fake:apr  1.083957e-02 -0.021795293 0.043474433 0.9999597
fake:jul-fake:apr  3.129938e-04 -0.004397443 0.005023430 1.0000000
real:jul-fake:apr -8.531846e-03 -0.041166709 0.024103017 0.9999995
fake:jun-fake:apr  6.695314e-04 -0.004040905 0.005379968 1.0000000
real:jun-fake:apr  1.627697e-03 -0.031007166 0.034262559 1.0000000
fake:mar-fake:apr  1.754309e-03 -0.002956128 0.006464745 0.9997217
real:mar-fake:apr  9.618735e-03 -0.023016128 0.042253598 0.9999953
fake:may-fake:apr -6.120974e-04 -0.005322534 0.004098339 1.0000000
real:may-fake:apr -7.793062e-03 -0.040427924 0.024841801 0.9999999
fake:nov-fake:apr  1.612040e-03 -0.003098396 0.006322477 0.9999323
real:nov-fake:apr -6.779575e-03 -0.039825881 0.026266732 1.0000000
fake:oct-fake:apr  1.034908e-03 -0.003675529 0.005745345 1.0000000
real:oct-fake:apr -1.086878e-03 -0.033721741 0.031547984 1.0000000
fake:sep-fake:apr  6.370533e-04 -0.004073383 0.005347490 1.0000000
real:sep-fake:apr  2.214804e-03 -0.030420058 0.034849667 1.0000000
fake:aug-real:apr -2.115604e-03 -0.036497849 0.032266640 1.0000000
real:aug-real:apr -7.826241e-03 -0.056221378 0.040568896 1.0000000
fake:dec-real:apr -1.169100e-03 -0.035551685 0.033213485 1.0000000
real:dec-real:apr  1.267834e-02 -0.035716796 0.061073478 0.9999995
fake:feb-real:apr -6.160914e-04 -0.034998336 0.033766153 1.0000000
real:feb-real:apr -4.285234e-03 -0.051454978 0.042884511 1.0000000
fake:jan-real:apr -5.038851e-04 -0.034886130 0.033878359 1.0000000
real:jan-real:apr  9.769584e-03 -0.037400161 0.056939328 1.0000000
fake:jul-real:apr -7.569928e-04 -0.035139237 0.033625252 1.0000000
real:jul-real:apr -9.601833e-03 -0.056771577 0.037567912 1.0000000
fake:jun-real:apr -4.004552e-04 -0.034782700 0.033981789 1.0000000
real:jun-real:apr  5.577101e-04 -0.046612034 0.047727455 1.0000000
fake:mar-real:apr  6.843222e-04 -0.033697922 0.035066567 1.0000000
real:mar-real:apr  8.548748e-03 -0.038620996 0.055718493 1.0000000
fake:may-real:apr -1.682084e-03 -0.036064328 0.032700161 1.0000000
real:may-real:apr -8.863048e-03 -0.056032793 0.038306696 1.0000000
fake:nov-real:apr  5.420539e-04 -0.033840191 0.034924298 1.0000000
real:nov-real:apr -7.849561e-03 -0.055304897 0.039605774 1.0000000
fake:oct-real:apr -3.507871e-05 -0.034417323 0.034347166 1.0000000
real:oct-real:apr -2.156865e-03 -0.049326609 0.045012880 1.0000000
fake:sep-real:apr -4.329333e-04 -0.034815178 0.033949311 1.0000000
real:sep-real:apr  1.144818e-03 -0.046024927 0.048314562 1.0000000
real:aug-fake:aug -5.710636e-03 -0.040092881 0.028671608 1.0000000
fake:dec-fake:aug  9.465048e-04 -0.003766416 0.005659425 1.0000000
real:dec-fake:aug  1.479395e-02 -0.019588299 0.049176190 0.9974584
fake:feb-fake:aug  1.499513e-03 -0.003210924 0.006209950 0.9999810
real:feb-fake:aug -2.169629e-03 -0.034804492 0.030465233 1.0000000
fake:jan-fake:aug  1.611719e-03 -0.003098717 0.006322156 0.9999326
real:jan-fake:aug  1.188519e-02 -0.020749675 0.044520051 0.9998071
fake:jul-fake:aug  1.358612e-03 -0.003351825 0.006069048 0.9999969
real:jul-fake:aug -7.486228e-03 -0.040121091 0.025148635 1.0000000
fake:jun-fake:aug  1.715149e-03 -0.002995287 0.006425586 0.9998077
real:jun-fake:aug  2.673315e-03 -0.029961548 0.035308177 1.0000000
fake:mar-fake:aug  2.799927e-03 -0.001910510 0.007510363 0.8888505
real:mar-fake:aug  1.066435e-02 -0.021970510 0.043299216 0.9999697
fake:may-fake:aug  4.335206e-04 -0.004276916 0.005143957 1.0000000
real:may-fake:aug -6.747444e-03 -0.039382306 0.025887419 1.0000000
fake:nov-fake:aug  2.657658e-03 -0.002052778 0.007368095 0.9314928
real:nov-fake:aug -5.733957e-03 -0.038780263 0.027312350 1.0000000
fake:oct-fake:aug  2.080526e-03 -0.002629911 0.006790962 0.9963202
real:oct-fake:aug -4.126044e-05 -0.032676123 0.032593602 1.0000000
fake:sep-fake:aug  1.682671e-03 -0.003027765 0.006393108 0.9998600
real:sep-fake:aug  3.260422e-03 -0.029374441 0.035895285 1.0000000
fake:dec-real:aug  6.657141e-03 -0.027725444 0.041039726 1.0000000
real:dec-real:aug  2.050458e-02 -0.027890555 0.068899719 0.9979662
fake:feb-real:aug  7.210150e-03 -0.027172095 0.041592394 1.0000000
real:feb-real:aug  3.541007e-03 -0.043628737 0.050710752 1.0000000
fake:jan-real:aug  7.322356e-03 -0.027059889 0.041704600 1.0000000
real:jan-real:aug  1.759582e-02 -0.029573920 0.064765569 0.9997143
fake:jul-real:aug  7.069248e-03 -0.027312996 0.041451493 1.0000000
real:jul-real:aug -1.775592e-03 -0.048945336 0.045394153 1.0000000
fake:jun-real:aug  7.425786e-03 -0.026956459 0.041808030 1.0000000
real:jun-real:aug  8.383951e-03 -0.038785793 0.055553695 1.0000000
fake:mar-real:aug  8.510563e-03 -0.025871681 0.042892808 0.9999998
real:mar-real:aug  1.637499e-02 -0.030794755 0.063544734 0.9999136
fake:may-real:aug  6.144157e-03 -0.028238087 0.040526401 1.0000000
real:may-real:aug -1.036807e-03 -0.048206552 0.046132937 1.0000000
fake:nov-real:aug  8.368295e-03 -0.026013950 0.042750539 0.9999999
real:nov-real:aug -2.332046e-05 -0.047478656 0.047432015 1.0000000
fake:oct-real:aug  7.791162e-03 -0.026591082 0.042173407 1.0000000
real:oct-real:aug  5.669376e-03 -0.041500368 0.052839120 1.0000000
fake:sep-real:aug  7.393308e-03 -0.026988937 0.041775552 1.0000000
real:sep-real:aug  8.971059e-03 -0.038198686 0.056140803 1.0000000
real:dec-fake:dec  1.384744e-02 -0.020535144 0.048230026 0.9990450
fake:feb-fake:dec  5.530084e-04 -0.004159912 0.005265929 1.0000000
real:feb-fake:dec -3.116134e-03 -0.035751355 0.029519087 1.0000000
fake:jan-fake:dec  6.652146e-04 -0.004047706 0.005378135 1.0000000
real:jan-fake:dec  1.093868e-02 -0.021696538 0.043573905 0.9999528
fake:jul-fake:dec  4.121070e-04 -0.004300814 0.005125027 1.0000000
real:jul-fake:dec -8.432733e-03 -0.041067954 0.024202489 0.9999996
fake:jun-fake:dec  7.686445e-04 -0.003944276 0.005481565 1.0000000
real:jun-fake:dec  1.726810e-03 -0.030908412 0.034362031 1.0000000
fake:mar-fake:dec  1.853422e-03 -0.002859499 0.006566342 0.9993385
real:mar-fake:dec  9.717848e-03 -0.022917373 0.042353069 0.9999944
fake:may-fake:dec -5.129842e-04 -0.005225905 0.004199936 1.0000000
real:may-fake:dec -7.693948e-03 -0.040329170 0.024941273 0.9999999
fake:nov-fake:dec  1.711154e-03 -0.003001767 0.006424074 0.9998165
real:nov-fake:dec -6.680462e-03 -0.039727122 0.026366199 1.0000000
fake:oct-fake:dec  1.134021e-03 -0.003578899 0.005846941 0.9999999
real:oct-fake:dec -9.877652e-04 -0.033622987 0.031647456 1.0000000
fake:sep-fake:dec  7.361665e-04 -0.003976754 0.005449087 1.0000000
real:sep-fake:dec  2.313918e-03 -0.030321304 0.034949139 1.0000000
fake:feb-real:dec -1.329443e-02 -0.047676677 0.021087812 0.9994926
real:feb-real:dec -1.696357e-02 -0.064133319 0.030206170 0.9998434
fake:jan-real:dec -1.318223e-02 -0.047564471 0.021200018 0.9995563
real:jan-real:dec -2.908757e-03 -0.050078502 0.044260987 1.0000000
fake:jul-real:dec -1.343533e-02 -0.047817578 0.020946911 0.9994011
real:jul-real:dec -2.228017e-02 -0.069449918 0.024889571 0.9909353
fake:jun-real:dec -1.307880e-02 -0.047461041 0.021303448 0.9996086
real:jun-real:dec -1.212063e-02 -0.059290375 0.035049114 0.9999997
fake:mar-real:dec -1.199402e-02 -0.046376263 0.022388226 0.9999061
real:mar-real:dec -4.129593e-03 -0.051299337 0.043040152 1.0000000
fake:may-real:dec -1.436042e-02 -0.048742669 0.020021820 0.9983512
real:may-real:dec -2.154139e-02 -0.068711134 0.025628355 0.9941869
fake:nov-real:dec -1.213629e-02 -0.046518532 0.022245957 0.9998854
real:nov-real:dec -2.052790e-02 -0.067983238 0.026927433 0.9972576
fake:oct-real:dec -1.271342e-02 -0.047095664 0.021668825 0.9997524
real:oct-real:dec -1.483521e-02 -0.062004950 0.032334538 0.9999847
fake:sep-real:dec -1.311127e-02 -0.047493519 0.021270970 0.9995928
real:sep-real:dec -1.153352e-02 -0.058703268 0.035636221 0.9999999
real:feb-fake:feb -3.669142e-03 -0.036304005 0.028965720 1.0000000
fake:jan-fake:feb  1.122063e-04 -0.004598230 0.004822643 1.0000000
real:jan-fake:feb  1.038567e-02 -0.022249188 0.043020538 0.9999811
fake:jul-fake:feb -1.409014e-04 -0.004851338 0.004569535 1.0000000
real:jul-fake:feb -8.985741e-03 -0.041620604 0.023649122 0.9999987
fake:jun-fake:feb  2.156362e-04 -0.004494801 0.004926073 1.0000000
real:jun-fake:feb  1.173801e-03 -0.031461061 0.033808664 1.0000000
fake:mar-fake:feb  1.300414e-03 -0.003410023 0.006010850 0.9999986
real:mar-fake:feb  9.164840e-03 -0.023470023 0.041799703 0.9999981
fake:may-fake:feb -1.065993e-03 -0.005776429 0.003644444 1.0000000
real:may-fake:feb -8.246957e-03 -0.040881820 0.024387906 0.9999998
fake:nov-fake:feb  1.158145e-03 -0.003552291 0.005868582 0.9999999
real:nov-fake:feb -7.233470e-03 -0.040279777 0.025812837 1.0000000
fake:oct-fake:feb  5.810127e-04 -0.004129424 0.005291449 1.0000000
real:oct-fake:feb -1.540774e-03 -0.034175636 0.031094089 1.0000000
fake:sep-fake:feb  1.831581e-04 -0.004527279 0.004893595 1.0000000
real:sep-fake:feb  1.760909e-03 -0.030873954 0.034395772 1.0000000
fake:jan-real:feb  3.781349e-03 -0.028853514 0.036416212 1.0000000
real:jan-real:feb  1.405482e-02 -0.031856840 0.059966475 0.9999906
fake:jul-real:feb  3.528241e-03 -0.029106622 0.036163104 1.0000000
real:jul-real:feb -5.316599e-03 -0.051228257 0.040595059 1.0000000
fake:jun-real:feb  3.884779e-03 -0.028750084 0.036519641 1.0000000
real:jun-real:feb  4.842944e-03 -0.041068714 0.050754602 1.0000000
fake:mar-real:feb  4.969556e-03 -0.027665307 0.037604419 1.0000000
real:mar-real:feb  1.283398e-02 -0.033077676 0.058745640 0.9999983
fake:may-real:feb  2.603150e-03 -0.030031713 0.035238013 1.0000000
real:may-real:feb -4.577814e-03 -0.050489472 0.041333844 1.0000000
fake:nov-real:feb  4.827288e-03 -0.027807575 0.037462151 1.0000000
real:nov-real:feb -3.564328e-03 -0.049769354 0.042640699 1.0000000
fake:oct-real:feb  4.250155e-03 -0.028384708 0.036885018 1.0000000
real:oct-real:feb  2.128369e-03 -0.043783289 0.048040027 1.0000000
fake:sep-real:feb  3.852301e-03 -0.028782562 0.036487163 1.0000000
real:sep-real:feb  5.430052e-03 -0.040481606 0.051341709 1.0000000
real:jan-fake:jan  1.027347e-02 -0.022361394 0.042908331 0.9999844
fake:jul-fake:jan -2.531077e-04 -0.004963544 0.004457329 1.0000000
real:jul-fake:jan -9.097947e-03 -0.041732810 0.023536915 0.9999984
fake:jun-fake:jan  1.034299e-04 -0.004607007 0.004813867 1.0000000
real:jun-fake:jan  1.061595e-03 -0.031573268 0.033696458 1.0000000
fake:mar-fake:jan  1.188207e-03 -0.003522229 0.005898644 0.9999998
real:mar-fake:jan  9.052633e-03 -0.023582229 0.041687496 0.9999985
fake:may-fake:jan -1.178199e-03 -0.005888636 0.003532238 0.9999998
real:may-fake:jan -8.359163e-03 -0.040994026 0.024275700 0.9999997
fake:nov-fake:jan  1.045939e-03 -0.003664498 0.005756376 1.0000000
real:nov-fake:jan -7.345676e-03 -0.040391983 0.025700630 1.0000000
fake:oct-fake:jan  4.688064e-04 -0.004241630 0.005179243 1.0000000
real:oct-fake:jan -1.652980e-03 -0.034287843 0.030981883 1.0000000
fake:sep-fake:jan  7.095184e-05 -0.004639485 0.004781389 1.0000000
real:sep-fake:jan  1.648703e-03 -0.030986160 0.034283566 1.0000000
fake:jul-real:jan -1.052658e-02 -0.043161439 0.022108286 0.9999760
real:jul-real:jan -1.937142e-02 -0.065283074 0.026540242 0.9980862
fake:jun-real:jan -1.017004e-02 -0.042804902 0.022464824 0.9999870
real:jun-real:jan -9.211873e-03 -0.055123531 0.036699784 1.0000000
fake:mar-real:jan -9.085261e-03 -0.041720124 0.023549601 0.9999984
real:mar-real:jan -1.220835e-03 -0.047132493 0.044690823 1.0000000
fake:may-real:jan -1.145167e-02 -0.044086530 0.021183195 0.9998963
real:may-real:jan -1.863263e-02 -0.064544290 0.027279026 0.9989273
fake:nov-real:jan -9.227530e-03 -0.041862392 0.023407333 0.9999979
real:nov-real:jan -1.761914e-02 -0.063824171 0.028585881 0.9995930
fake:oct-real:jan -9.804662e-03 -0.042439525 0.022830201 0.9999934
real:oct-real:jan -1.192645e-02 -0.057838106 0.033985209 0.9999996
fake:sep-real:jan -1.020252e-02 -0.042837380 0.022432346 0.9999863
real:sep-real:jan -8.624766e-03 -0.054536424 0.037286892 1.0000000
real:jul-fake:jul -8.844840e-03 -0.041479703 0.023790023 0.9999990
fake:jun-fake:jul  3.565376e-04 -0.004353899 0.005066974 1.0000000
real:jun-fake:jul  1.314703e-03 -0.031320160 0.033949566 1.0000000
fake:mar-fake:jul  1.441315e-03 -0.003269122 0.006151752 0.9999907
real:mar-fake:jul  9.305741e-03 -0.023329122 0.041940604 0.9999975
fake:may-fake:jul -9.250912e-04 -0.005635528 0.003785346 1.0000000
real:may-fake:jul -8.106055e-03 -0.040740918 0.024528808 0.9999998
fake:nov-fake:jul  1.299047e-03 -0.003411390 0.006009483 0.9999987
real:nov-fake:jul -7.092569e-03 -0.040138875 0.025953738 1.0000000
fake:oct-fake:jul  7.219141e-04 -0.003988523 0.005432351 1.0000000
real:oct-fake:jul -1.399872e-03 -0.034034735 0.031234991 1.0000000
fake:sep-fake:jul  3.240595e-04 -0.004386377 0.005034496 1.0000000
real:sep-fake:jul  1.901811e-03 -0.030733052 0.034536673 1.0000000
fake:jun-real:jul  9.201377e-03 -0.023433485 0.041836240 0.9999980
real:jun-real:jul  1.015954e-02 -0.035752115 0.056071201 1.0000000
fake:mar-real:jul  1.028615e-02 -0.022348708 0.042921018 0.9999841
real:mar-real:jul  1.815058e-02 -0.027761077 0.064062239 0.9992822
fake:may-real:jul  7.919749e-03 -0.024715114 0.040554611 0.9999999
real:may-real:jul  7.387845e-04 -0.045172873 0.046650442 1.0000000
fake:nov-real:jul  1.014389e-02 -0.022490976 0.042778749 0.9999876
real:nov-real:jul  1.752271e-03 -0.044452755 0.047957297 1.0000000
fake:oct-real:jul  9.566754e-03 -0.023068109 0.042201617 0.9999958
real:oct-real:jul  7.444968e-03 -0.038466690 0.053356626 1.0000000
fake:sep-real:jul  9.168899e-03 -0.023465964 0.041803762 0.9999981
real:sep-real:jul  1.074665e-02 -0.035165007 0.056658308 0.9999999
real:jun-fake:jun  9.581653e-04 -0.031676697 0.033593028 1.0000000
fake:mar-fake:jun  1.084777e-03 -0.003625659 0.005795214 1.0000000
real:mar-fake:jun  8.949204e-03 -0.023685659 0.041584066 0.9999988
fake:may-fake:jun -1.281629e-03 -0.005992065 0.003428808 0.9999990
real:may-fake:jun -8.462593e-03 -0.041097456 0.024172270 0.9999996
fake:nov-fake:jun  9.425091e-04 -0.003767928 0.005652946 1.0000000
real:nov-fake:jun -7.449106e-03 -0.040495413 0.025597200 1.0000000
fake:oct-fake:jun  3.653765e-04 -0.004345060 0.005075813 1.0000000
real:oct-fake:jun -1.756410e-03 -0.034391273 0.030878453 1.0000000
fake:sep-fake:jun -3.247807e-05 -0.004742915 0.004677959 1.0000000
real:sep-fake:jun  1.545273e-03 -0.031089590 0.034180136 1.0000000
fake:mar-real:jun  1.266121e-04 -0.032508251 0.032761475 1.0000000
real:mar-real:jun  7.991038e-03 -0.037920620 0.053902696 1.0000000
fake:may-real:jun -2.239794e-03 -0.034874657 0.030395069 1.0000000
real:may-real:jun -9.420758e-03 -0.055332416 0.036490900 1.0000000
fake:nov-real:jun -1.565622e-05 -0.032650519 0.032619207 1.0000000
real:nov-real:jun -8.407271e-03 -0.054612298 0.037797755 1.0000000
fake:oct-real:jun -5.927888e-04 -0.033227652 0.032042074 1.0000000
real:oct-real:jun -2.714575e-03 -0.048626233 0.043197083 1.0000000
fake:sep-real:jun -9.906434e-04 -0.033625506 0.031644219 1.0000000
real:sep-real:jun  5.871077e-04 -0.045324550 0.046498766 1.0000000
real:mar-fake:mar  7.864426e-03 -0.024770437 0.040499289 0.9999999
fake:may-fake:mar -2.366406e-03 -0.007076843 0.002344031 0.9805362
real:may-fake:mar -9.547370e-03 -0.042182233 0.023087493 0.9999959
fake:nov-fake:mar -1.422683e-04 -0.004852705 0.004568168 1.0000000
real:nov-fake:mar -8.533884e-03 -0.041580190 0.024512423 0.9999996
fake:oct-fake:mar -7.194009e-04 -0.005429838 0.003991036 1.0000000
real:oct-fake:mar -2.841187e-03 -0.035476050 0.029793676 1.0000000
fake:sep-fake:mar -1.117255e-03 -0.005827692 0.003593181 0.9999999
real:sep-fake:mar  4.604956e-04 -0.032174367 0.033095358 1.0000000
fake:may-real:mar -1.023083e-02 -0.042865695 0.022404031 0.9999856
real:may-real:mar -1.741180e-02 -0.063323454 0.028499861 0.9996271
fake:nov-real:mar -8.006694e-03 -0.040641557 0.024628168 0.9999999
real:nov-real:mar -1.639831e-02 -0.062603336 0.029806716 0.9998745
fake:oct-real:mar -8.583827e-03 -0.041218690 0.024051036 0.9999995
real:oct-real:mar -1.070561e-02 -0.056617271 0.035206045 1.0000000
fake:sep-real:mar -8.981682e-03 -0.041616544 0.023653181 0.9999987
real:sep-real:mar -7.403931e-03 -0.053315588 0.038507727 1.0000000
real:may-fake:may -7.180964e-03 -0.039815827 0.025453899 1.0000000
fake:nov-fake:may  2.224138e-03 -0.002486299 0.006934575 0.9909768
real:nov-fake:may -6.167477e-03 -0.039213784 0.026878829 1.0000000
fake:oct-fake:may  1.647005e-03 -0.003063432 0.006357442 0.9999024
real:oct-fake:may -4.747810e-04 -0.033109644 0.032160082 1.0000000
fake:sep-fake:may  1.249151e-03 -0.003461286 0.005959587 0.9999994
real:sep-fake:may  2.826902e-03 -0.029807961 0.035461765 1.0000000
fake:nov-real:may  9.405102e-03 -0.023229761 0.042039965 0.9999969
real:nov-real:may  1.013487e-03 -0.045191539 0.047218513 1.0000000
fake:oct-real:may  8.827969e-03 -0.023806893 0.041462832 0.9999991
real:oct-real:may  6.706183e-03 -0.039205475 0.052617841 1.0000000
fake:sep-real:may  8.430115e-03 -0.024204748 0.041064978 0.9999996
real:sep-real:may  1.000787e-02 -0.035903792 0.055919524 1.0000000
real:nov-fake:nov -8.391615e-03 -0.041437922 0.024654691 0.9999997
fake:oct-fake:nov -5.771326e-04 -0.005287569 0.004133304 1.0000000
real:oct-fake:nov -2.698919e-03 -0.035333782 0.029935944 1.0000000
fake:sep-fake:nov -9.749872e-04 -0.005685424 0.003735450 1.0000000
real:sep-fake:nov  6.027639e-04 -0.032032099 0.033237627 1.0000000
fake:oct-real:nov  7.814483e-03 -0.025231824 0.040860789 0.9999999
real:oct-real:nov  5.692696e-03 -0.040512330 0.051897723 1.0000000
fake:sep-real:nov  7.416628e-03 -0.025629678 0.040462935 1.0000000
real:sep-real:nov  8.994379e-03 -0.037210647 0.055199405 1.0000000
real:oct-fake:oct -2.121786e-03 -0.034756649 0.030513077 1.0000000
fake:sep-fake:oct -3.978545e-04 -0.005108291 0.004312582 1.0000000
real:sep-fake:oct  1.179897e-03 -0.031454966 0.033814759 1.0000000
fake:sep-real:oct  1.723932e-03 -0.030910931 0.034358794 1.0000000
real:sep-real:oct  3.301683e-03 -0.042609975 0.049213341 1.0000000
real:sep-fake:sep  1.577751e-03 -0.031057112 0.034212614 1.0000000

> TukeyHSD(aov(m2))
  Tukey multiple comparisons of means
    95% family-wise confidence level

Fit: aov(formula = m2)

$`as.factor(v$source)`
                   diff         lwr         upr     p adj
real-fake -7.044617e-05 -0.00521621 0.005075317 0.9785936

$`as.factor(v$month)`
                 diff          lwr         upr     p adj
aug-apr -1.109253e-03 -0.005321419 0.003102914 0.9994348
dec-apr  2.107334e-05 -0.004193293 0.004235440 1.0000000
feb-apr  4.057061e-04 -0.003805363 0.004616775 1.0000000
jan-apr  6.631478e-04 -0.003547921 0.004874217 0.9999968
jul-apr  2.108911e-04 -0.004000178 0.004421960 1.0000000
jun-apr  6.695434e-04 -0.003541526 0.004880613 0.9999964
mar-apr  1.826261e-03 -0.002384808 0.006037330 0.9604665
may-apr -6.968680e-04 -0.004907937 0.003514201 0.9999946
nov-apr  1.516804e-03 -0.002694540 0.005728147 0.9906977
oct-apr  1.002837e-03 -0.003208232 0.005213906 0.9997854
sep-apr  6.435193e-04 -0.003567550 0.004854589 0.9999976
dec-aug  1.130326e-03 -0.003084041 0.005344692 0.9993279
feb-aug  1.514959e-03 -0.002696111 0.005726028 0.9907862
jan-aug  1.772400e-03 -0.002438669 0.005983470 0.9682592
jul-aug  1.320144e-03 -0.002890926 0.005531213 0.9971844
jun-aug  1.778796e-03 -0.002432273 0.005989865 0.9673998
mar-aug  2.935514e-03 -0.001275556 0.007146583 0.4923383
may-aug  4.123846e-04 -0.003798685 0.004623454 1.0000000
nov-aug  2.626056e-03 -0.001585287 0.006837400 0.6673084
oct-aug  2.112090e-03 -0.002098980 0.006323159 0.8947483
sep-aug  1.752772e-03 -0.002458297 0.005963841 0.9707905
feb-dec  3.846327e-04 -0.003828637 0.004597903 1.0000000
jan-dec  6.420745e-04 -0.003571195 0.004855345 0.9999977
jul-dec  1.898178e-04 -0.004023452 0.004403088 1.0000000
jun-dec  6.484700e-04 -0.003564800 0.004861740 0.9999975
mar-dec  1.805188e-03 -0.002408082 0.006018458 0.9638062
may-dec -7.179413e-04 -0.004931211 0.003495329 0.9999927
nov-dec  1.495731e-03 -0.002717813 0.005709274 0.9917569
oct-dec  9.817637e-04 -0.003231506 0.005195034 0.9998265
sep-dec  6.224460e-04 -0.003590824 0.004835716 0.9999983
jan-feb  2.574418e-04 -0.003952530 0.004467414 1.0000000
jul-feb -1.948149e-04 -0.004404787 0.004015157 1.0000000
jun-feb  2.638373e-04 -0.003946135 0.004473809 1.0000000
mar-feb  1.420555e-03 -0.002789417 0.005630527 0.9946389
may-feb -1.102574e-03 -0.005312546 0.003107398 0.9994636
nov-feb  1.111098e-03 -0.003099148 0.005321344 0.9994233
oct-feb  5.971309e-04 -0.003612841 0.004807103 0.9999989
sep-feb  2.378132e-04 -0.003972159 0.004447785 1.0000000
jul-jan -4.522567e-04 -0.004662229 0.003757715 0.9999999
jun-jan  6.395502e-06 -0.004203576 0.004216367 1.0000000
mar-jan  1.163113e-03 -0.003046859 0.005373085 0.9991122
may-jan -1.360016e-03 -0.005569988 0.002849956 0.9963283
nov-jan  8.536560e-04 -0.003356590 0.005063902 0.9999565
oct-jan  3.396892e-04 -0.003870283 0.004549661 1.0000000
sep-jan -1.962855e-05 -0.004229600 0.004190343 1.0000000
jun-jul  4.586522e-04 -0.003751320 0.004668624 0.9999999
mar-jul  1.615370e-03 -0.002594602 0.005825342 0.9844364
may-jul -9.077591e-04 -0.005117731 0.003302213 0.9999195
nov-jul  1.305913e-03 -0.002904333 0.005516159 0.9974395
oct-jul  7.919459e-04 -0.003418026 0.005001918 0.9999797
sep-jul  4.326282e-04 -0.003777344 0.004642600 1.0000000
mar-jun  1.156718e-03 -0.003053254 0.005366690 0.9991568
may-jun -1.366411e-03 -0.005576383 0.002843561 0.9961741
nov-jun  8.472605e-04 -0.003362986 0.005057507 0.9999597
oct-jun  3.332937e-04 -0.003876678 0.004543266 1.0000000
sep-jun -2.602405e-05 -0.004235996 0.004183948 1.0000000
may-mar -2.523129e-03 -0.006733101 0.001686843 0.7216838
nov-mar -3.094571e-04 -0.004519703 0.003900789 1.0000000
oct-mar -8.234239e-04 -0.005033396 0.003386548 0.9999698
sep-mar -1.182742e-03 -0.005392714 0.003027230 0.9989624
nov-may  2.213672e-03 -0.001996574 0.006423918 0.8602416
oct-may  1.699705e-03 -0.002510267 0.005909677 0.9768231
sep-may  1.340387e-03 -0.002869585 0.005550359 0.9967699
oct-nov -5.139669e-04 -0.004724213 0.003696279 0.9999998
sep-nov -8.732846e-04 -0.005083531 0.003336962 0.9999454
sep-oct -3.593177e-04 -0.004569290 0.003850654 1.0000000
